# Supplementary material for: E-Configuration Improves Antioxidant and Cytoprotective Capacities of Resveratrols
Source: MDPI journal article supplement (doi:10.3390/molecules23071790), 2018-07-20
Supplement: s1 [file s1]

**产品分析证书**  
Certificate of Analysis

中文名称：白藜芦醇

English Name：Resveratrol

别名(Alias):

产品编码(Cat. No.):BP1204

CAS Number: 501-36-0

分子式(M. F.): C<sub>14</sub>H<sub>12</sub>O<sub>3</sub>

分子量(M. W.): 228.247

批号(Batch No.): PRF8091921

报告日期(Report date): 2017-09-19

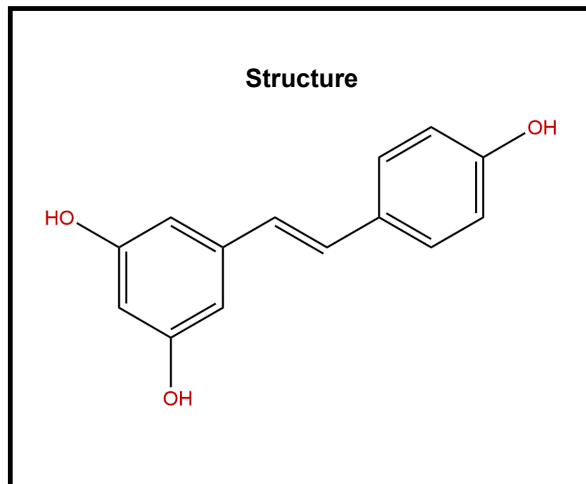

**检验结果 ( Analytical result ) :**

| 检验项目 ( Test Item )         | 检验指标 ( Specifications )   | 检验结果 ( Results ) |
|----------------------------|---------------------------|------------------|
| 外观Appearance               | Off-white powder          | Off-white powder |
| 纯度Purity (HPLC-DAD,306nm)* | ≥98.0%                    | 99.96%           |
| 质谱Mass                     | 228.2±1                   | Conforms         |
| 核磁NMR                      | Comply with the structure | Conforms         |
| 水分Water Content            | < 3.0%                    | 1.17%            |

\* 色谱图见附件 ( Please find HPLC chromatography attached. )

检测方法 ( Test Method ) : Column: Thermo HyPURITY C18 , 4.6\*150mm , 3.0um; Column temperature: 30°C; Detection Mode: UV306nm;

Flow Rate: 1.0ml/min; Sample dissolution: Methanol; Mobile Phase: A, 0.1% phosphoric acid in water B, Acetonitrile; Gradient elution: B,

20%-30%,15min.

贮存条件 ( Storage ) :2~8°C, protected from light, keep package airproofed when not in use.

复测期 ( Retest date ) :two years (2019-09-18) under conditions list above.

QC: Zhang Ling

Date: 2017-09-19

QA: Wu Qi

Date: 2017-09-19

备注(Remarks): The sample solutions should be prepared on the same day, it is the best preparing the solutions immediately before use. If the solutions have to be made up in advance, it should be made as aliquots in tightly sealed vials at less than -20°C. Generally, these might be useable for up to two weeks.

In case of quality issue, please contact us within 15 days after receipt of the product.

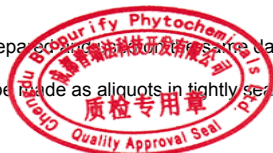

Tel: +86-28-82633397 Fax: +86-28-82633165

http://www.phytopurify.com Email: sales@biopurify.com biopurify@gmail.com

# SAMPLE INFORMATION

|                                        |              |                     |              |
|----------------------------------------|--------------|---------------------|--------------|
| Sample Name:                           | Resveratrol  | Acquired By:        | System       |
| Sample Type:                           | Standard     | Sample Set Name:    |              |
| Vial:                                  | 32           | Acq. Method Set:    | Resveratrol  |
| Injection #:                           | 1            | Processing Method:  | Samples      |
| Injection Volume:                      | 10.00 ul     | Channel Name:       | 306.0nm      |
| Run Time:                              | 25.0 Minutes | Proc. Chnl. Descr.: | PDA 306.0 nm |
| Date Acquired: 2017-9-19 11:12:01 CST  |              |                     |              |
| Date Processed: 2017-9-19 12:36:57 CST |              |                     |              |

## Auto-Scaled Chromatogram

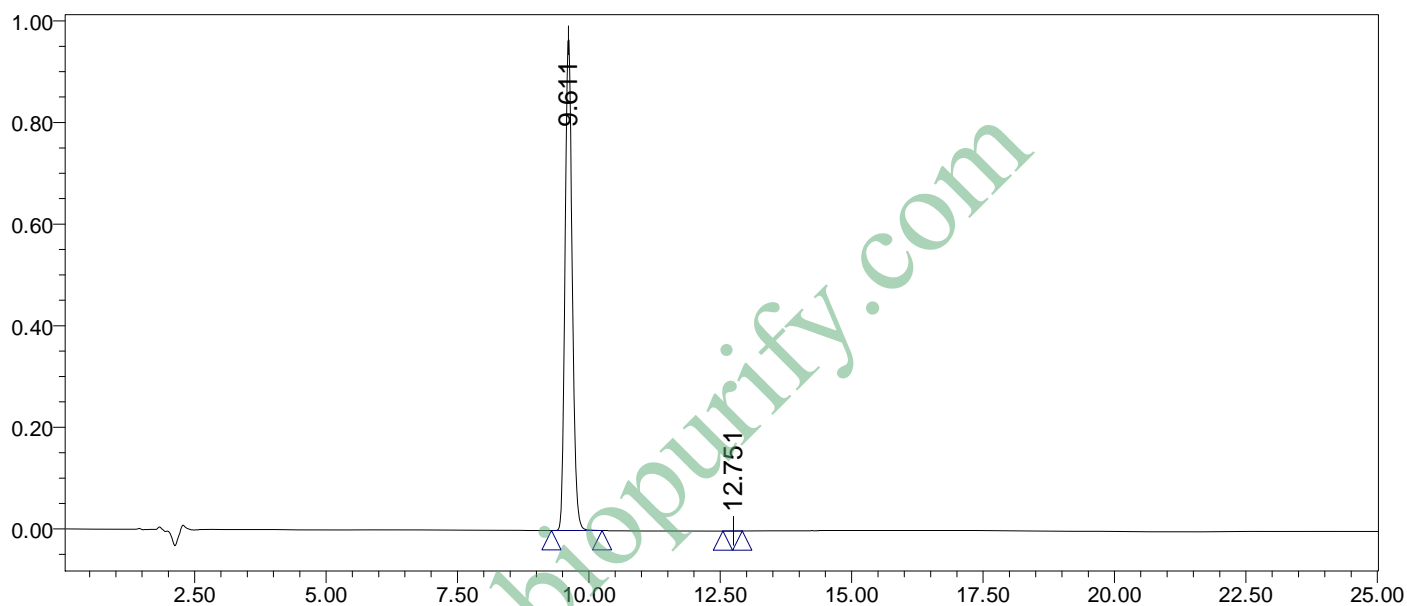

## Peak Results

|   | RT     | Area    | % Area | USP Plate Count | USP Resolution |
|---|--------|---------|--------|-----------------|----------------|
| 1 | 9.611  | 9192525 | 99.96  | 23798.00        |                |
| 2 | 12.751 | 3419    | 0.04   | 37980.93        | 11.75          |

# Certificate of Analysis

## 1. Sample information

Chemical name: Cis-resveratrol / (Z)-resveratrol

**CAS number: 61434-67-1**

Molecular formula: C<sub>14</sub>H<sub>12</sub>O<sub>3</sub>

Molecular weight: 228.247 g/mol

## 2. HPLC analysis

Column: Agilent ZORBAX SB-C<sub>18</sub> (250 × 4.6 mm, 5 μm)

Column temperature: 30°C

Detection mode: UV 286 nm

Flow rate: 1.0 mL/min

Sample dissolution: Methanol

Mobile phase: A, 0.1% phosphoric acid in water; B, acetonitrile

Gradient elution: B, 20-30%, 15 min

Injection volume: 10 μL

Run time: 25 minutes

## 3. Chromatogram

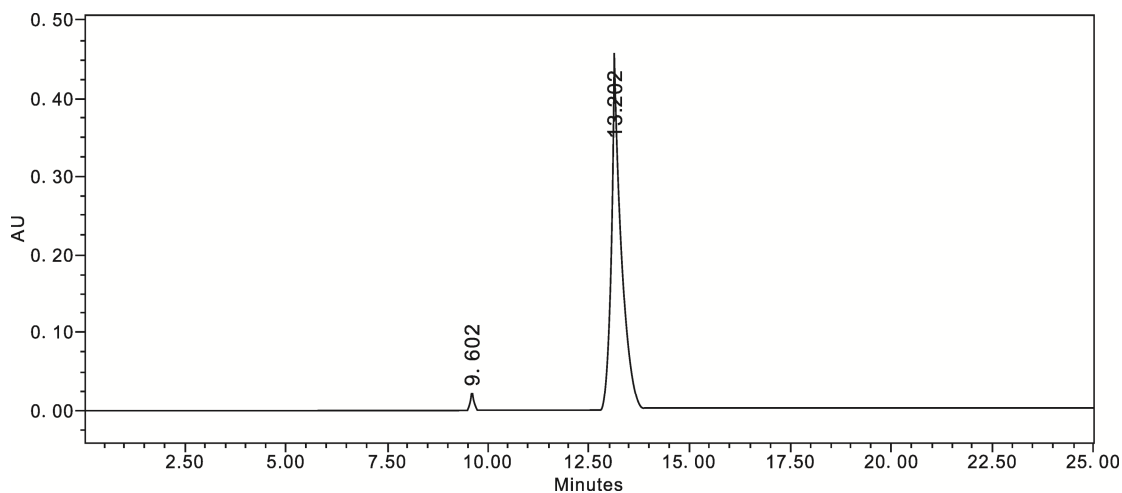

## 4. Analysis results

|   | Retention time (min) | Peak area | % area |
|---|----------------------|-----------|--------|
| 1 | 9.602                | 174337    | 1.98   |
| 2 | 13.202               | 8630568   | 98.02  |

Report date: 01/03/2018

## NMR data of *E*- and *Z*-resveratrol

**Table S1.**  $^1\text{H}$  and  $^{13}\text{C}$  chemical shifts and some coupling constants of resveratrol isomers (ppm).

| Position | <i>E</i> -Resveratrol   |                       | <i>Z</i> -Resveratrol   |                       |
|----------|-------------------------|-----------------------|-------------------------|-----------------------|
|          | $^1\text{H}$ (ppm)      | $^{13}\text{C}$ (ppm) | $^1\text{H}$ (ppm)      | $^{13}\text{C}$ (ppm) |
| 1        |                         | 139.2                 |                         | 139.1                 |
| 2,6      | 6.37 ( $^4J = 2.2$ Hz)  | 104.4                 | 6.11 ( $^4J = 2.2$ Hz)  | 106.4                 |
| 3,5      | 9.19                    | 158.6                 | 9.11                    | 158.4                 |
| 4        | 6.10 ( $^4J = 2.2$ Hz)  | 101.9                 | 6.05 ( $^4J = 2.1$ Hz)  | 101.6                 |
| 1'       |                         | 128.0                 |                         | 127.4                 |
| 2',6'    | 7.38 ( $^3J = 8.3$ Hz)  | 127.8                 | 7.06 ( $^3J = 8.6$ Hz)  | 130.0                 |
| 3',5'    | 6.74 ( $^3J = 8.3$ Hz)  | 115.6                 | 6.61 ( $^3J = 8.6$ Hz)  | 115.0                 |
| 4'       | 9.55                    | 157.3                 | 9.47                    | 156.7                 |
| 1''      | 6.79 ( $^3J = 16.2$ Hz) | 125.6                 | 6.25 ( $^3J = 12.3$ Hz) | 128.0                 |
| 2''      | 6.90 ( $^3J = 16.2$ Hz) | 127.9                 | 6.35 ( $^3J = 12.3$ Hz) | 129.4                 |

Position refers to the numbering in Figure S1. Hydrogens 3, 5 and 4' are OH protons, all other protons are carbon-bound ones.

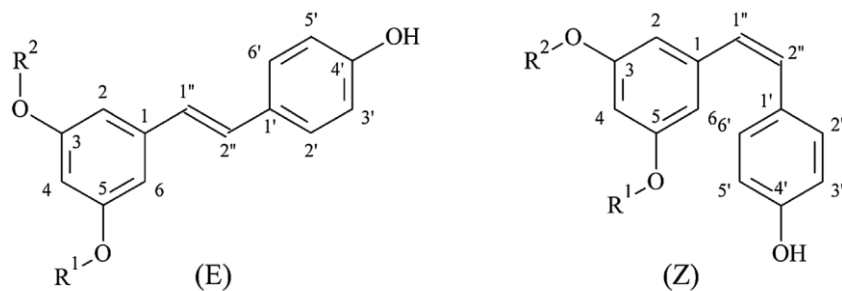

**Figure S1.** Structure and numbering of *E*- and *Z*-resveratrol ( $R_1 = R_2 = \text{H}$ ).
