# Supplementary material for: E-Configuration Improves Antioxidant and Cytoprotective Capacities of Resveratrols
Source: MDPI journal article supplement (doi:10.3390/molecules23071790), 2018-07-20
Supplement: s1 [file s1]

## ***E*-Configuration Improves Antioxidant and Cytoprotective Capacities of Resveratrols**

**Jian Lin**<sup>1,2</sup>, **Xican Li**<sup>3,4</sup>, **Ban Chen**<sup>3,4</sup>, **Gang Wei**<sup>4,5</sup>, and **Dongfeng Chen**<sup>1,2,\*</sup>

<sup>1</sup> School of Basic Medical Science, Guangzhou University of Chinese Medicine, Waihuan East Road No. 232, Guangzhou Higher Education Mega Center, Guangzhou 510006, China; [linjianchn@outlook.com](mailto:linjianchn@outlook.com) (J.L.)

<sup>2</sup> The Research Center of Basic Integrative Medicine, Guangzhou University of Chinese Medicine, Waihuan East Road No. 232, Guangzhou Higher Education Mega Center, Guangzhou 510006, China;

<sup>3</sup> School of Biomedical Sciences, Monash University, Melbourne, Australia.

<sup>4</sup> School of Chinese Herbal Medicine, Guangzhou University of Chinese Medicine, Waihuan East Road No. 232, Guangzhou Higher Education Mega Center, Guangzhou 510006, China; [imchenban@foxmail.com](mailto:imchenban@foxmail.com) (B.C.)

<sup>5</sup> Innovative Research & Development Laboratory of TCM, Guangzhou University of Chinese Medicine, Waihuan East Road No. 232, Guangzhou Higher Education Mega Center, Guangzhou 510006, China;

\* Correspondence: [lixican@126.com](mailto:lixican@126.com) or [lixc@gzucm.edu.cn](mailto:lixc@gzucm.edu.cn) (X.L.); [chen888@gzucm.edu.cn](mailto:chen888@gzucm.edu.cn) (D.C.); Tel.: +86-203-935-8076 (X.L.)

**Note:** This Supporting information provides the original data of Table 1 in the main text. All data underline are mentioned in **Table 1** in the main text.

1. Superoxide anion ( $\bullet\text{O}_2^-$ ) scavenging assay

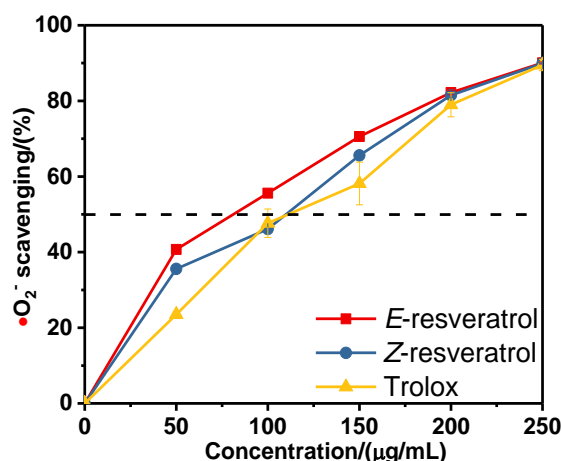

Fig. S3.1 The dose response curves of *E*-resveratrol and *Z*-resveratrol and the positive control in  $\bullet\text{O}_2^-$  scavenging assay.

Tab. S3.1 The comparison of  $\text{IC}_{50}$  values of *E*-resveratrol and *Z*-resveratrol and positive control in  $\bullet\text{O}_2^-$  scavenging assay.

|                       | Mean $\pm$ SD<br>$\mu\text{g/mL}$ | Mean $\pm$ SD<br>$\mu\text{M}$ |
|-----------------------|-----------------------------------|--------------------------------|
| <i>E</i> -resveratrol | 78.8 $\pm$ 1.3                    | 345.3 $\pm$ 5.5 <sup>a</sup>   |
| <i>Z</i> -resveratrol | 102.3 $\pm$ 1.1                   | 448.2 $\pm$ 4.9 <sup>b</sup>   |
| Trolox                | 127.0 $\pm$ 7.6                   | 507.1 $\pm$ 30.4 <sup>c</sup>  |

$\text{IC}_{50}$  value was defined as the concentration of 50% superoxide anion radical inhibition and calculated by linear regression which was analyzed by Origin 6.0 professional software. Means values with different superscripts in the same column are significantly different ( $p < 0.05$ ).

2. Ferric-reducing antioxidant power (FRAP) assay ( $\text{Fe}^{3+}$ -Reducing)

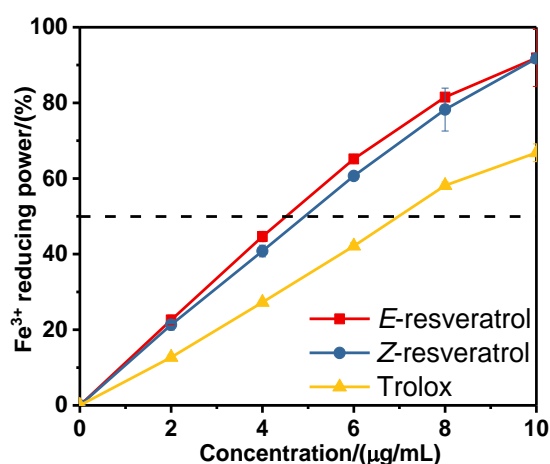

Fig. S3.2 The dose response curves of *E*-resveratrol and *Z*-resveratrol and the positive control in FRAP assay.

Tab. S3.2 The comparison of IC<sub>50</sub> values of *E*-resveratrol and *Z*-resveratrol and positive control in FRAP assay.

|                       | Mean±SD<br>μg/mL | Mean±SD<br>μM               |
|-----------------------|------------------|-----------------------------|
| <i>E</i> -resveratrol | 4.7±0.2          | <u>20.7±0.7<sup>a</sup></u> |
| <i>Z</i> -resveratrol | 5.0±0.2          | <u>22.1±0.9<sup>b</sup></u> |
| Trolox                | 7.2±0.2          | <u>28.9±0.8<sup>c</sup></u> |

IC<sub>50</sub> value was defined as the concentration of 50% superoxide anion radical inhibition and calculated by linear regression which was analyzed by Origin 6.0 professional software. Means values with different superscripts in the same column are significantly different ( $p<0.05$ ).

### 3. Cupric ions (Cu<sup>2+</sup>) reducing antioxidant capacity (CUPRAC) assay

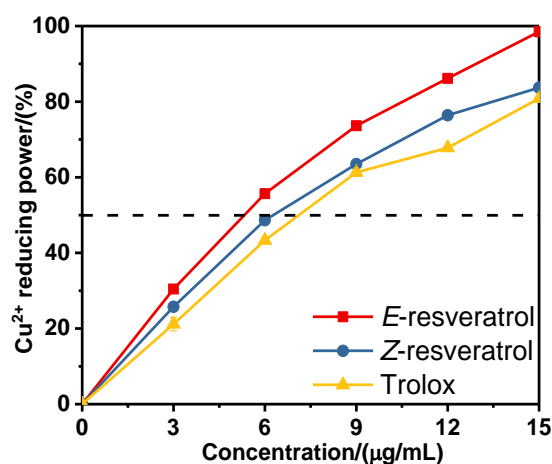

Fig. S3.3 The dose response curves of *E*-resveratrol and *Z*-resveratrol and the positive control in Cu<sup>2+</sup> reducing assay.

Tab. S3.3 The comparison of IC<sub>50</sub> values of *E*-resveratrol and *Z*-resveratrol and positive control in Cu<sup>2+</sup> reducing assay.

|                       | Mean±SD<br>μg/mL | Mean±SD<br>μM               |
|-----------------------|------------------|-----------------------------|
| <i>E</i> -resveratrol | 5.6±0.1          | <u>24.5±0.3<sup>a</sup></u> |
| <i>Z</i> -resveratrol | 7.0±0.1          | <u>30.7±0.4<sup>b</sup></u> |
| Trolox                | 8.0±0.1          | <u>31.9±0.3<sup>c</sup></u> |

IC<sub>50</sub> value was defined as the concentration of 50% superoxide anion radical inhibition and calculated by linear regression which was analyzed by Origin 6.0 professional software. Means values with different superscripts in the same column are significantly different ( $p<0.05$ ).

### 4. PTIO•-scavenging assay (pH 4.5)

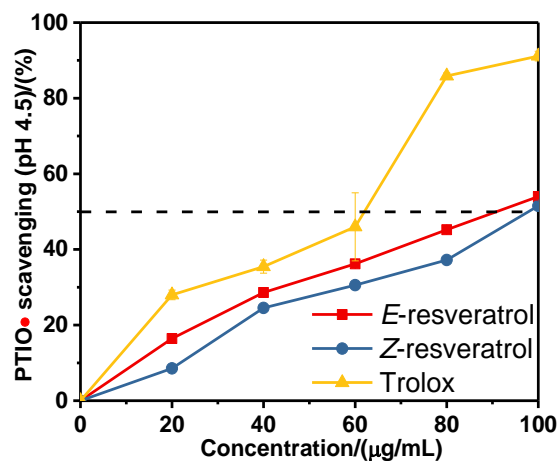

Fig. S3.4 The does response curves of *E*-resveratrol and *Z*-resveratrol and the positive control in PTIO•-scavenging assay (pH 4.5).

Tab. S3.4 The comparison of IC<sub>50</sub> values of *E*-resveratrol and *Z*-resveratrol and positive control in PTIO•-scavenging assay (pH 4.5).

|                       | Mean±SD<br>μg/mL | Mean±SD<br>μM                |
|-----------------------|------------------|------------------------------|
| <i>E</i> -resveratrol | 90.4±0.9         | <u>395.9±3.9<sup>b</sup></u> |
| <i>Z</i> -resveratrol | 100.0±1.1        | <u>436.3±4.9<sup>c</sup></u> |
| Trolox                | 51.8±1.6         | <u>206.9±6.5<sup>a</sup></u> |

IC<sub>50</sub> value was defined as the concentration of 50% superoxide anion radical inhibition and calculated by linear regression which was analyzed by Origin 6.0 professional software. Means values with different superscripts in the same column are significantly different ( $p < 0.05$ ).

#### 5. PTIO•-scavenging assay (pH 7.4)

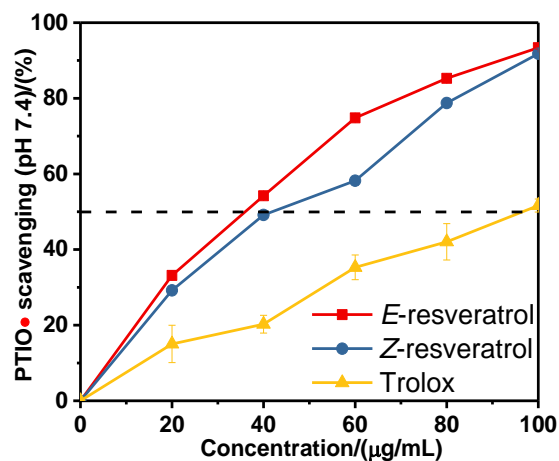

Fig. S3.5 The does response curves of *E*-resveratrol and *Z*-resveratrol and the positive control in PTIO•-scavenging assay (pH 7.4).

Tab. S3.5 The comparison of IC<sub>50</sub> values of *E*-resveratrol and *Z*-resveratrol and positive control in PTIO•-scavenging assay (pH 7.4).

|                       | Mean±SD<br>μg/mL | Mean±SD<br>μM                |
|-----------------------|------------------|------------------------------|
| <i>E</i> -resveratrol | 36.0±0.7         | <u>157.7±3.2<sup>a</sup></u> |
| <i>Z</i> -resveratrol | 45.2±0.2         | <u>198.2±0.9<sup>b</sup></u> |
| Trolox                | 96.1±2.2         | <u>383.8±8.8<sup>c</sup></u> |

IC<sub>50</sub> value was defined as the concentration of 50% superoxide anion radical inhibition and calculated by linear regression which was analyzed by Origin 6.0 professional software. Means values with different superscripts in the same column are significantly different ( $p<0.05$ ).

#### 6. DPPH•-scavenging assay

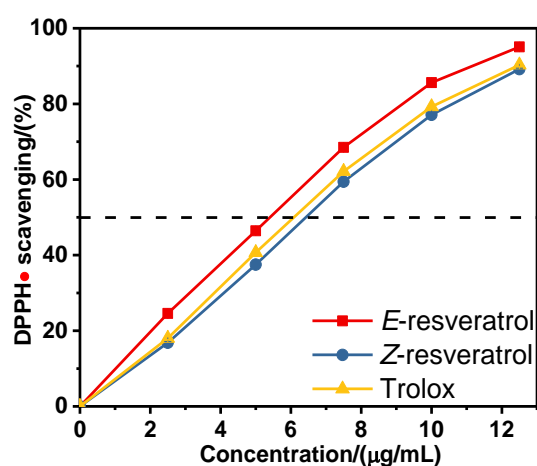

Fig. S3.6 The dose response curves of *E*-resveratrol and *Z*-resveratrol and the positive control in DPPH•-scavenging assay.

Tab. S3.6 The comparison of IC<sub>50</sub> values of *E*-resveratrol and *Z*-resveratrol and positive control in DPPH•-scavenging assay.

|                       | Mean±SD<br>μg/mL | Mean±SD<br>μM               |
|-----------------------|------------------|-----------------------------|
| <i>E</i> -resveratrol | 5.6±0.1          | <u>24.3±0.1<sup>a</sup></u> |
| <i>Z</i> -resveratrol | 6.7±0.1          | <u>29.3±0.2<sup>c</sup></u> |
| Trolox                | 6.4±0.1          | <u>25.6±0.2<sup>b</sup></u> |

IC<sub>50</sub> value was defined as the concentration of 50% superoxide anion radical inhibition and calculated by linear regression which was analyzed by Origin 6.0 professional software. Means values with different superscripts in the same column are significantly different ( $p<0.05$ ).
