# Supplementary material for: E-Configuration Improves Antioxidant and Cytoprotective Capacities of Resveratrols
Source: Molecules. 2018 Jul 20;23(7):1790. doi: 10.3390/molecules23071790 (PMC6100583; doi:10.3390/molecules23071790)
Supplement: Supplementary file 1 [file molecules-23-01790-s001.zip]

Archive with 5 entries (4 files):
- molecules-327814-SI/
- molecules-327814-SI/Suppl. 1 3,5-dihydroxystilbene.tif
- molecules-327814-SI/Suppl. 2 Maximol A & B.tif
- molecules-327814-SI/Suppl. 3 Dose response curves.pdf
- molecules-327814-SI/Suppl. 4 Certificate of Analysis.pdf
